# Supplementary material
Source: publisher figshare collection journal article supplement (https://diabetesjournals.figshare.com/ndownloader/files/31554989)

## Checklist for Reporting Human Islet Preparations Used in Research

Adapted from Hart NJ, Powers AC (2018) Progress, challenges, and suggestions for using human islets to understand islet biology and human diabetes. Diabetologia <https://doi.org/10.1007/s00125-018-4772-2>.

|                                                                                                                                                                                                                                                                |                                                                              |
|----------------------------------------------------------------------------------------------------------------------------------------------------------------------------------------------------------------------------------------------------------------|------------------------------------------------------------------------------|
| <b>Manuscript DOI:</b> <a href="https://doi.org/10.2337/[insert manuscript submission number]">https://doi.org/10.2337/[insert manuscript submission number]</a> (Example, <a href="https://doi.org/10.2337/db18-1234">https://doi.org/10.2337/db18-1234</a> ) |                                                                              |
| <b>Title:</b> <a href="#">The Role of TRAPγ/SSR3 in Preproinsulin Translocation Into the Endoplasmic Reticulum</a>                                                                                                                                             |                                                                              |
| <b>Author list:</b> Xiaoxi Xu, Yumeng Huang, Xin Li, Peter Arvan, Ming Liu                                                                                                                                                                                     |                                                                              |
| <b>Corresponding author:</b> Arvan                                                                                                                                                                                                                             | <b>Email address:</b> <a href="mailto:parvan@umich.edu">parvan@umich.edu</a> |

| Islet preparation              | 1           | 2 | 3 | 4 | 5 | 6 | 7 | 8 <sup>a</sup> |
|--------------------------------|-------------|---|---|---|---|---|---|----------------|
| MANDATORY INFORMATION          |             |   |   |   |   |   |   |                |
| Unique identifier              | HP-21177-01 |   |   |   |   |   |   |                |
| Donor age (years)              | 54          |   |   |   |   |   |   |                |
| Donor sex (M/F)                | M           |   |   |   |   |   |   |                |
| Donor BMI (kg/m <sup>2</sup> ) | 24.8        |   |   |   |   |   |   |                |

|                                                                             |       |  |  |  |  |  |  |  |
|-----------------------------------------------------------------------------|-------|--|--|--|--|--|--|--|
| Donor HbA <sub>1c</sub> or other measure of blood glucose control           | 5.4%  |  |  |  |  |  |  |  |
| Origin/source of islets <sup>b</sup>                                        | Prodo |  |  |  |  |  |  |  |
| Islet isolation centre                                                      | Prodo |  |  |  |  |  |  |  |
| Donor hx of diabetes?<br><b>NO</b>                                          |       |  |  |  |  |  |  |  |
| <b>If Yes, complete the next two lines if this information is available</b> |       |  |  |  |  |  |  |  |
| Diabetes duration (years)                                                   | N/A   |  |  |  |  |  |  |  |
| Glucose-lowering therapy at time of death <sup>c</sup>                      | N/A   |  |  |  |  |  |  |  |

| RECOMMENDED INFORMATION |             |  |  |  |  |  |  |  |
|-------------------------|-------------|--|--|--|--|--|--|--|
| Donor cause of death    | Head trauma |  |  |  |  |  |  |  |
| Warm ischaemia time (h) | None        |  |  |  |  |  |  |  |
| Cold ischaemia time (h) | 9 hours     |  |  |  |  |  |  |  |

|                                                                                   |           |  |  |  |  |  |  |  |
|-----------------------------------------------------------------------------------|-----------|--|--|--|--|--|--|--|
| Estimated purity (%)                                                              | 90%       |  |  |  |  |  |  |  |
| Estimated viability (%)                                                           | 95%       |  |  |  |  |  |  |  |
| Total culture time (h) <sup>d</sup>                                               | 2.5 days  |  |  |  |  |  |  |  |
| Glucose-stimulated insulin secretion or other functional measurement <sup>e</sup> | See below |  |  |  |  |  |  |  |
| Handpicked to purity?<br>Yes                                                      |           |  |  |  |  |  |  |  |
| Additional notes                                                                  |           |  |  |  |  |  |  |  |

<sup>e</sup>Please specify the test and the results:

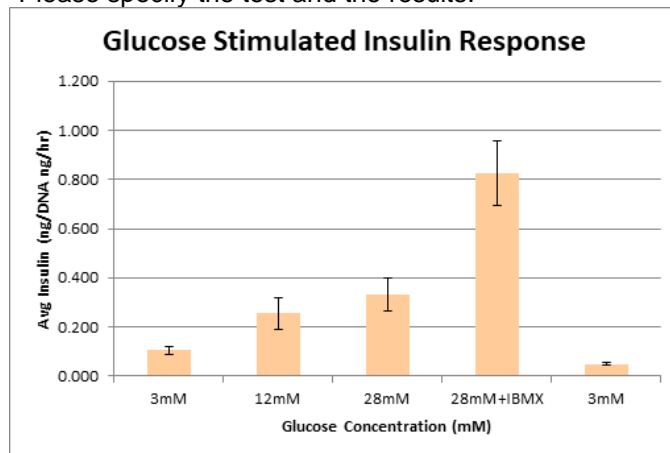

Supplement: Supplementary file 1 [file 31554989]
